# Supplementary material for: An efficient route to asymmetrically diconjugated tris(heteroleptic) complexes of Ru(ii)
Source: Royal Society of Chemistry journal article supplement (doi:10.1039/c6ra06086b), 2016-01-01
Supplement: c6ra06086b1.pdf [file c6ra06086b1.pdf]

## **An Efficient Route to Asymmetrically Diconjugated tris(heteroleptic) Complexes of Ru(II)**

Christopher S. Burke<sup>a</sup> and Tia E. Keyes<sup>a</sup>

---

<sup>a</sup> *School of Chemical Sciences, Dublin City University, Dublin 9, Co. Dublin, Ireland.*

Supplementary Information

Structural characterisation of the Ru(II) complexes and conjugates  
**[Ru(dppz)(DMSO)<sub>2</sub>Cl<sub>2</sub>] (1)**

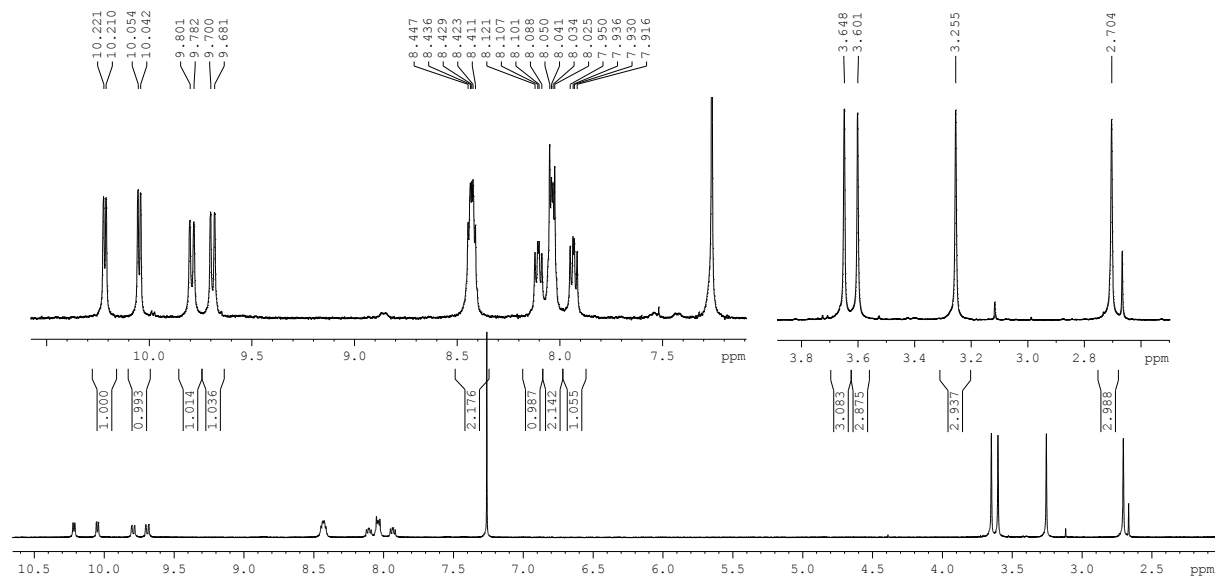

Figure S1 – <sup>1</sup>H NMR Spectrum (400 MHz) of **(1)** in CDCl<sub>3</sub>.

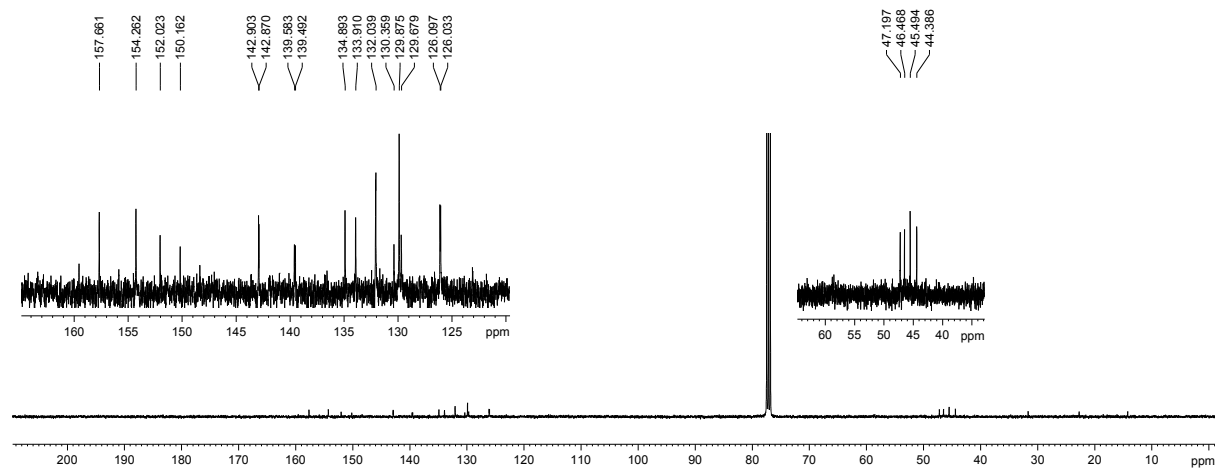

Figure S2 – <sup>13</sup>C NMR Spectrum of **(1)** in CDCl<sub>3</sub>.

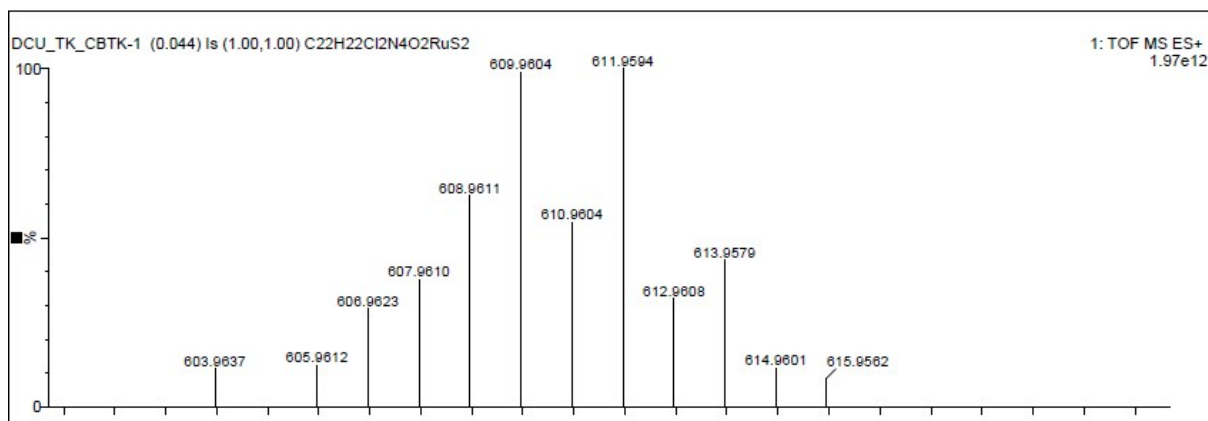

Figure S3 – HR-MS (ESI-QTOF): Single Mass Analysis of **(1)** indicating  $[M]^+$ .

**[Ru(dppz)(bpy)(ox)] (2)**

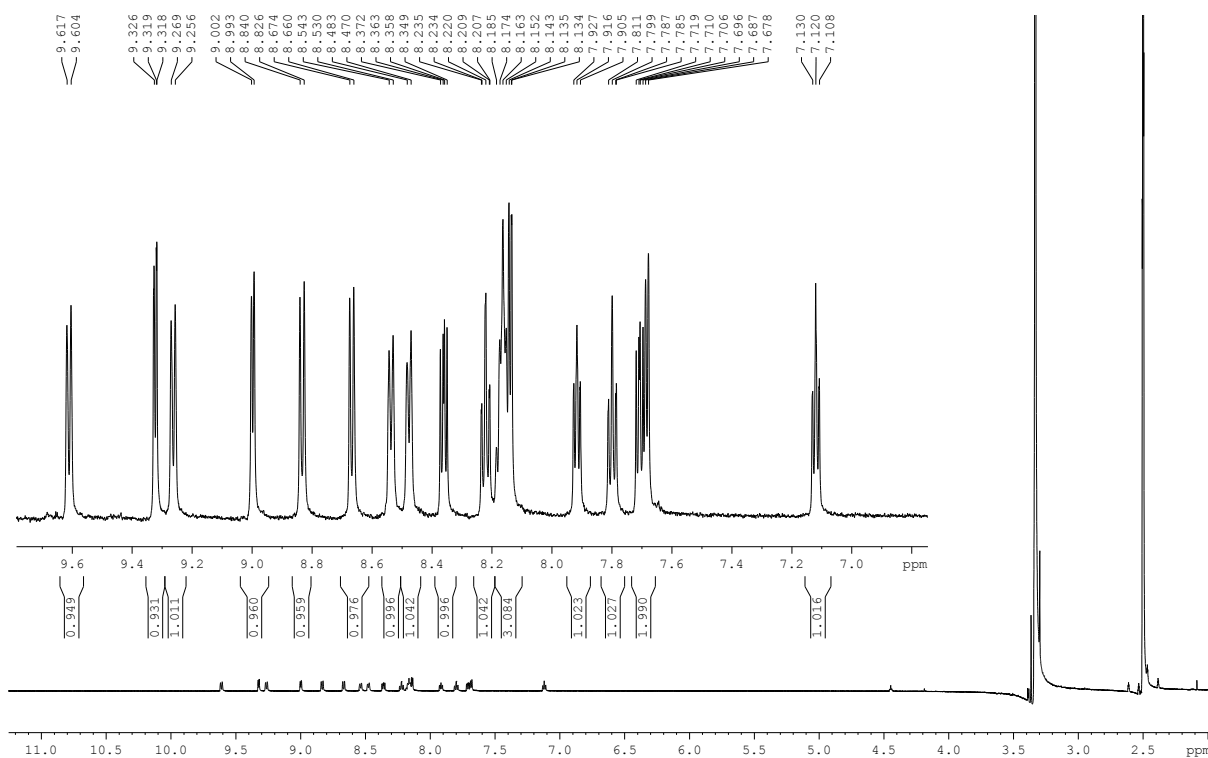

Figure S4 –  $^1\text{H}$  NMR Spectrum (400 MHz) of **(2)** in  $\text{DMSO-d}_6$ .

### Single Mass Analysis

Tolerance = 5.0 PPM / DBE: min = -1.5, max = 1000.0

Isotope cluster parameters: Separation = 1.0 Abundance = 1.0%

Monoisotopic Mass, Odd and Even Electron Ions

106 formula(e) evaluated with 1 results within limits (all results (up to 1000) for each mass)

DCU\_TK\_CBTk-022 13 (0.431) AM (Cen,4, 80.00, Ar,1,0,556.28,0.70,LS 1); Sm (Mn, 2x5.00); Sb (16,15.00 ); Cm (13:23)

1: TOF MS ES+

1.56e4

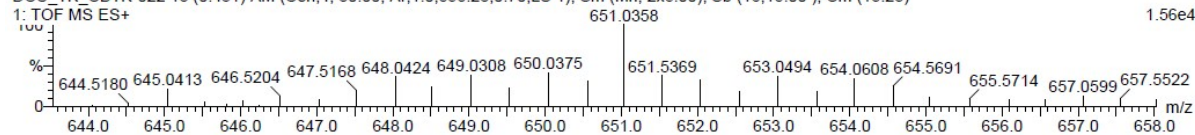

Minimum: -1.5  
Maximum: 1000.0

| Mass     | Calc. Mass | mDa | PPM | DBE  | Score | Formula             |
|----------|------------|-----|-----|------|-------|---------------------|
| 651.0358 | 651.0331   | 2.7 | 4.2 | 24.5 | 1     | C30 H18 N6 O4 Na Ru |

Figure S5 – HR-MS (ESI-QTOF): Single Mass Analysis of **(2)** indicating  $[M + Na]^+$ .

### [Ru(dppz)(bpyArCOOH)(ox)] **(3)**

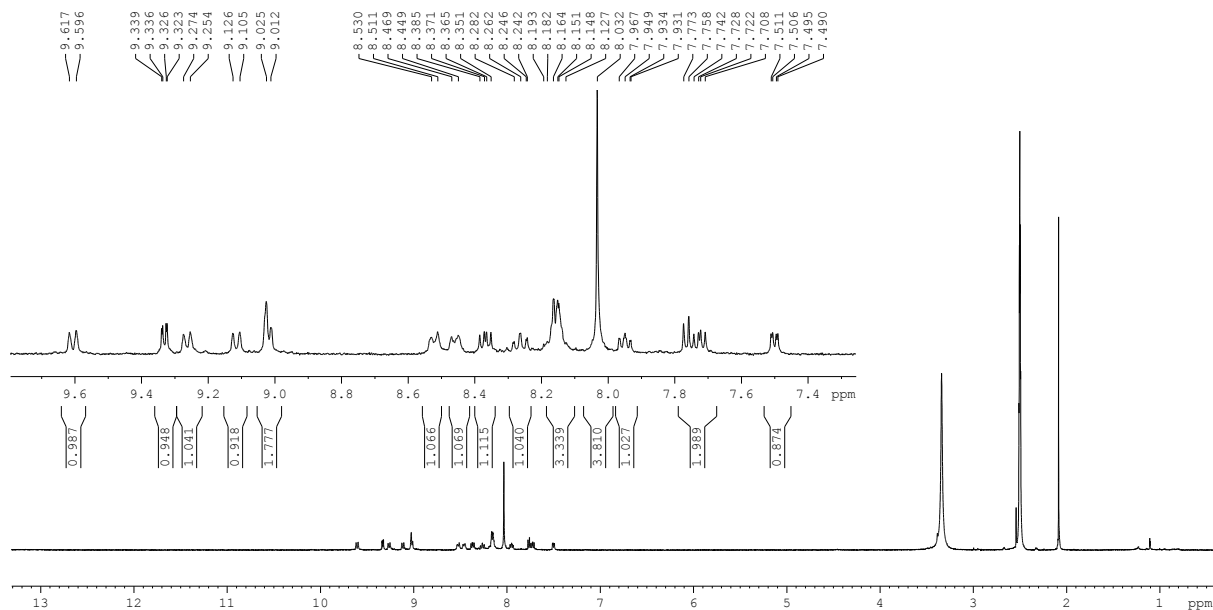

Figure S6 –  $^1\text{H}$  NMR Spectrum (400 MHz) of **(3)** in  $\text{DMSO-d}_6$ .

**[Ru(dppz)(bpy)(bpyArCOOEt)](PF<sub>6</sub>)<sub>2</sub> (**4**)**

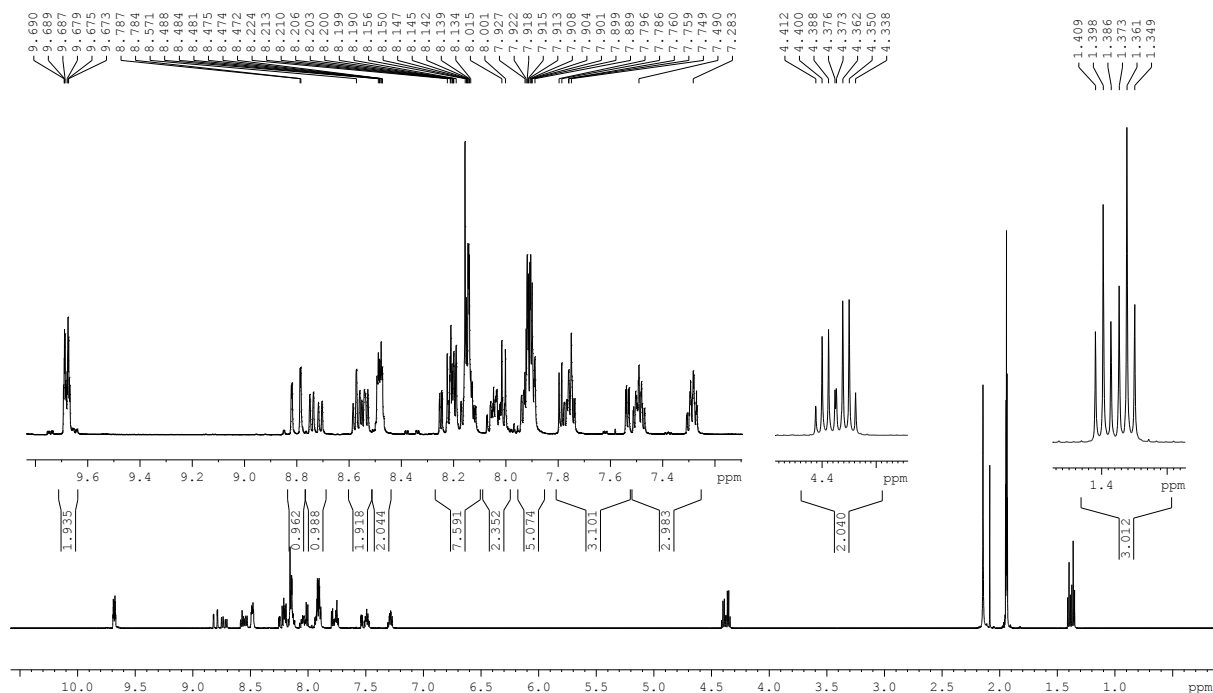

Figure S7 – <sup>1</sup>H NMR Spectrum (600 MHz) of (**4**) in CD<sub>3</sub>CN.

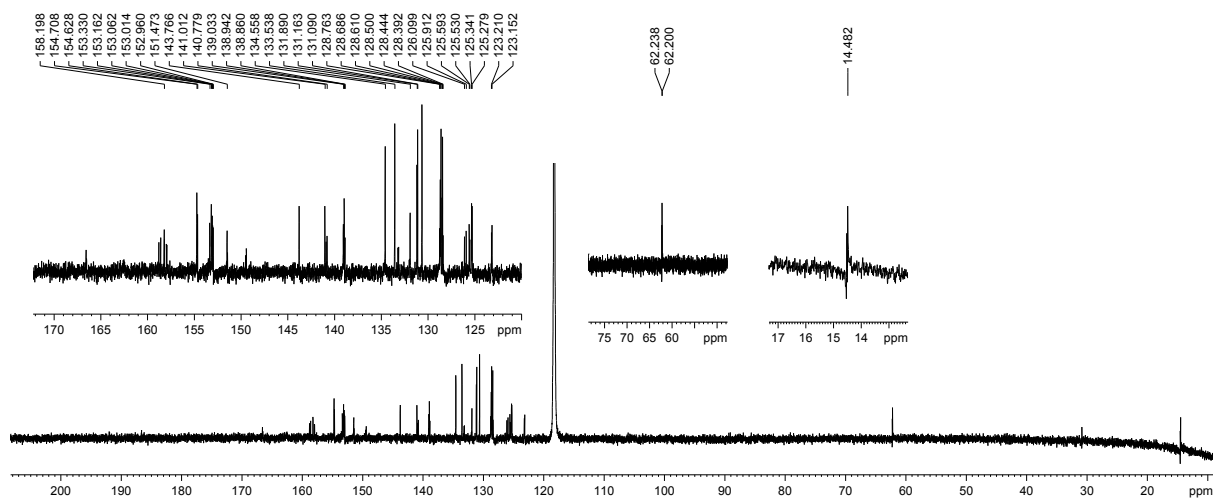

Figure S8 – <sup>13</sup>C NMR Spectrum of (**4**) in CD<sub>3</sub>CN.

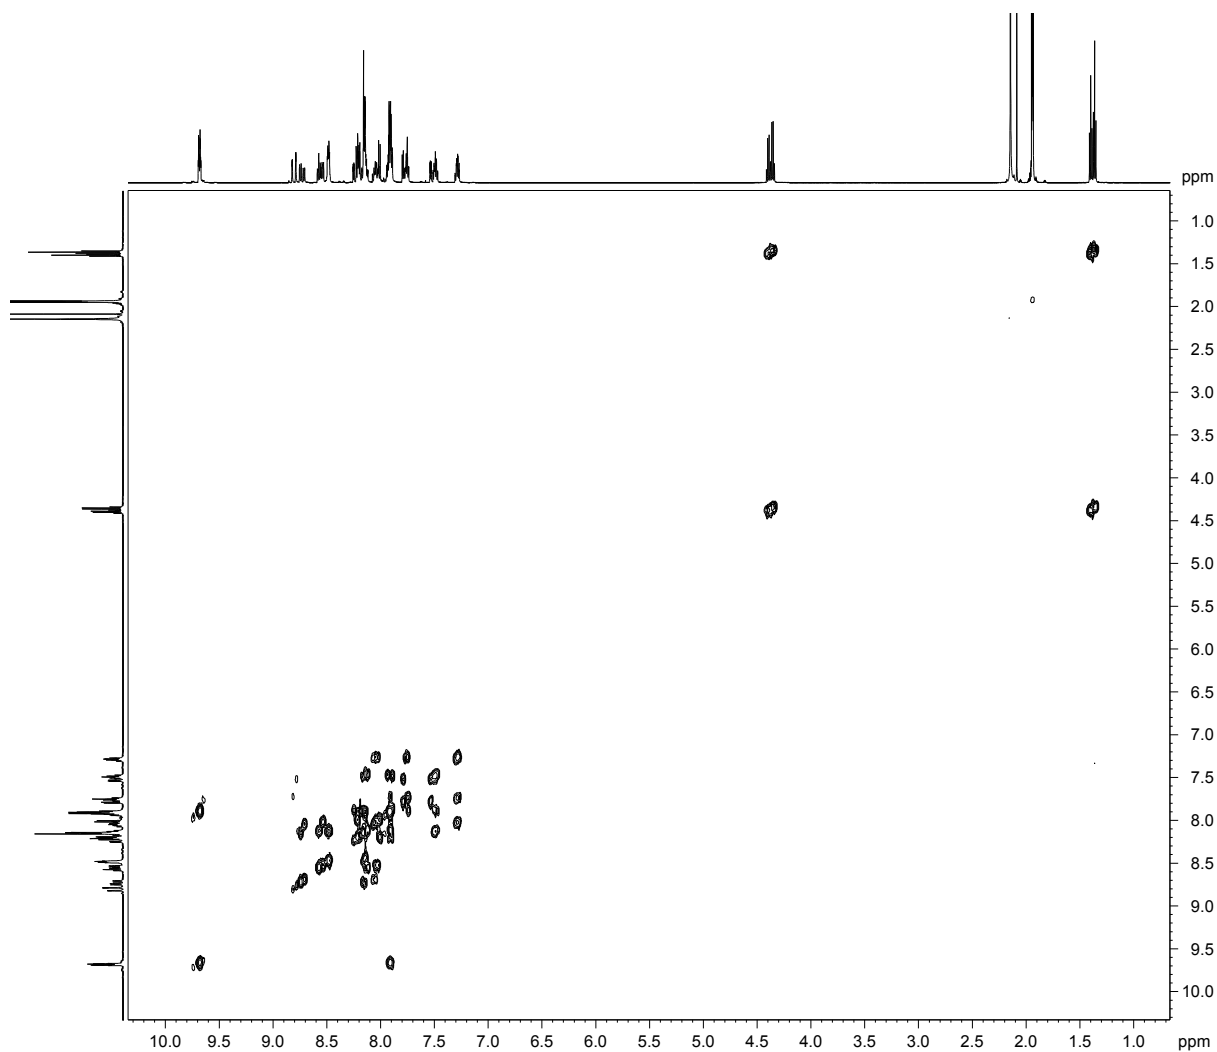

Figure S9 – COSY Spectrum (600 MHz) of **(4)** in CD<sub>3</sub>CN.

### Single Mass Analysis

Tolerance = 5.0 PPM / DBE: min = -1.5, max = 1000.0  
 Isotope cluster parameters: Separation = 1.0 Abundance = 1.0%

Monoisotopic Mass, Odd and Even Electron Ions

392 formula(e) evaluated with 1 results within limits (all results (up to 1000) for each mass)

DCU\_TK\_CBTK-020 24 (0.769) AM (Cen,4, 80.00, Ar,1,0,556.28,0.70,LS 1); Sm (Mn, 2x5.00); Sb (16,15.00); Cm (24:28)

1: TOF MS ES+

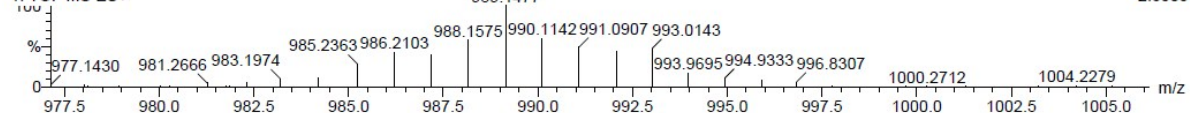

Minimum: -1.5  
 Maximum: 200.0 5.0 1000.0

| Mass     | Calc. Mass | mDa  | PPM  | DBE  | Score | Formula               |
|----------|------------|------|------|------|-------|-----------------------|
| 989.1477 | 989.1490   | -1.3 | -1.3 | 32.5 | 1     | C47 H34 N8 O2 Ru F6 P |

Figure S10 – HRMS (ESI-QTOF): Single Mass Analysis of **(4)** indicating [M – PF<sub>6</sub>]<sup>+</sup>.

**[Ru(dppz)(bpy)(bpyArCOOH)](PF<sub>6</sub>)<sub>2</sub> (**5**)**

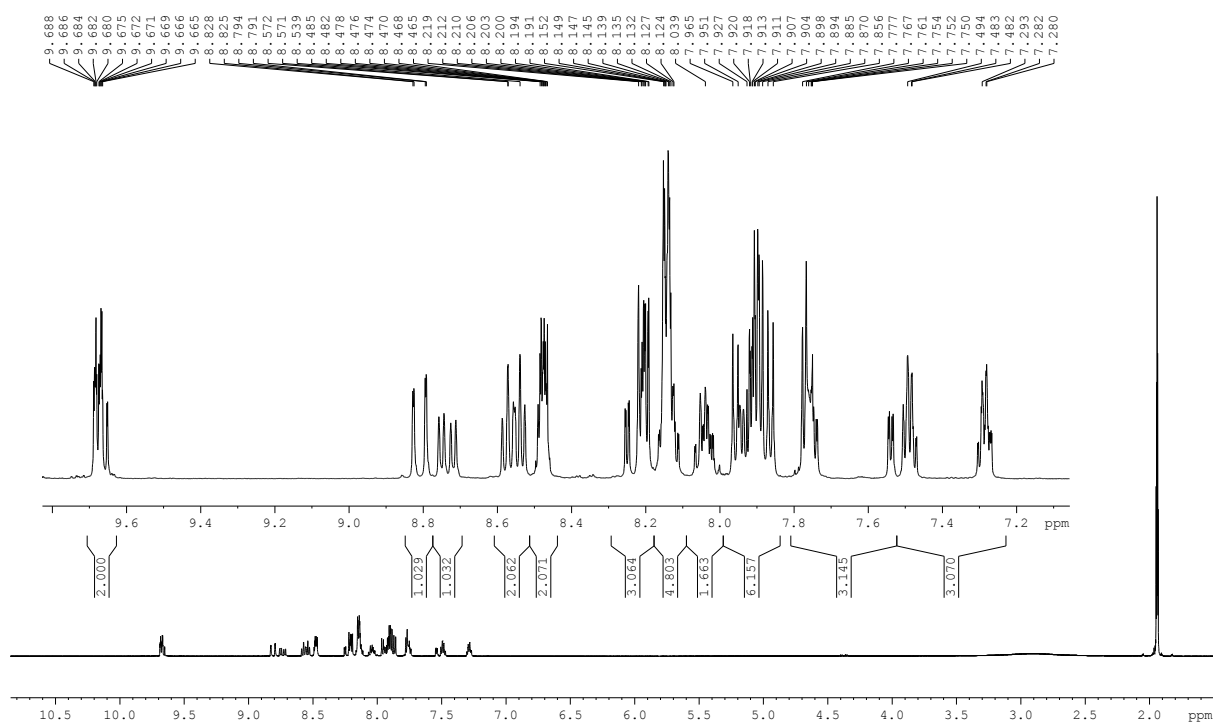

Figure S11 – <sup>1</sup>H NMR Spectrum (600 MHz) of (**5**) in CD<sub>3</sub>CN.

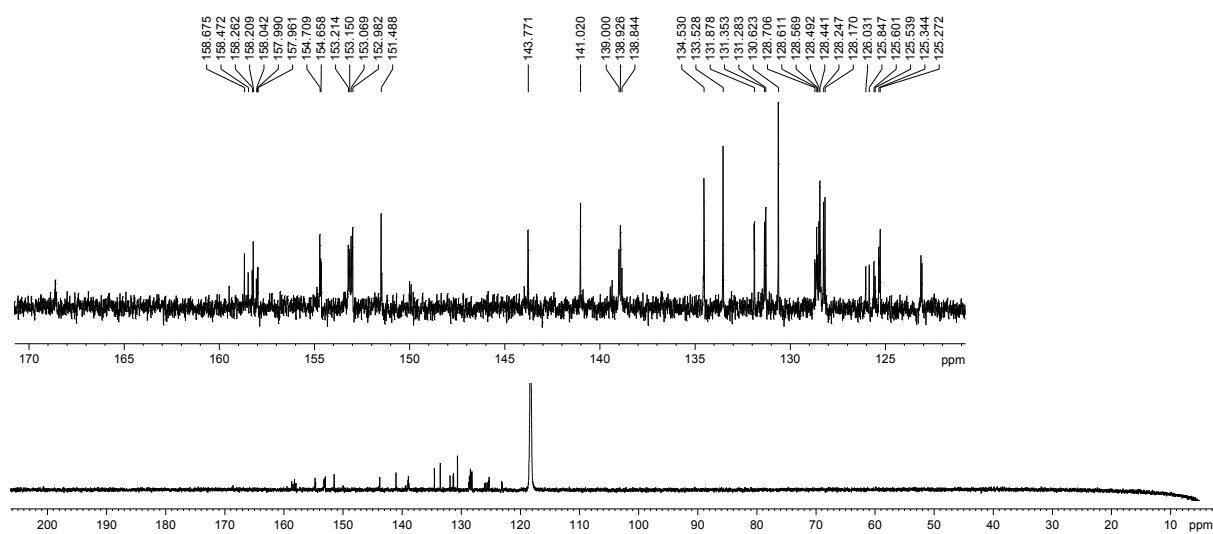

Figure S12 – <sup>13</sup>C NMR Spectrum of (**5**) in CD<sub>3</sub>CN.

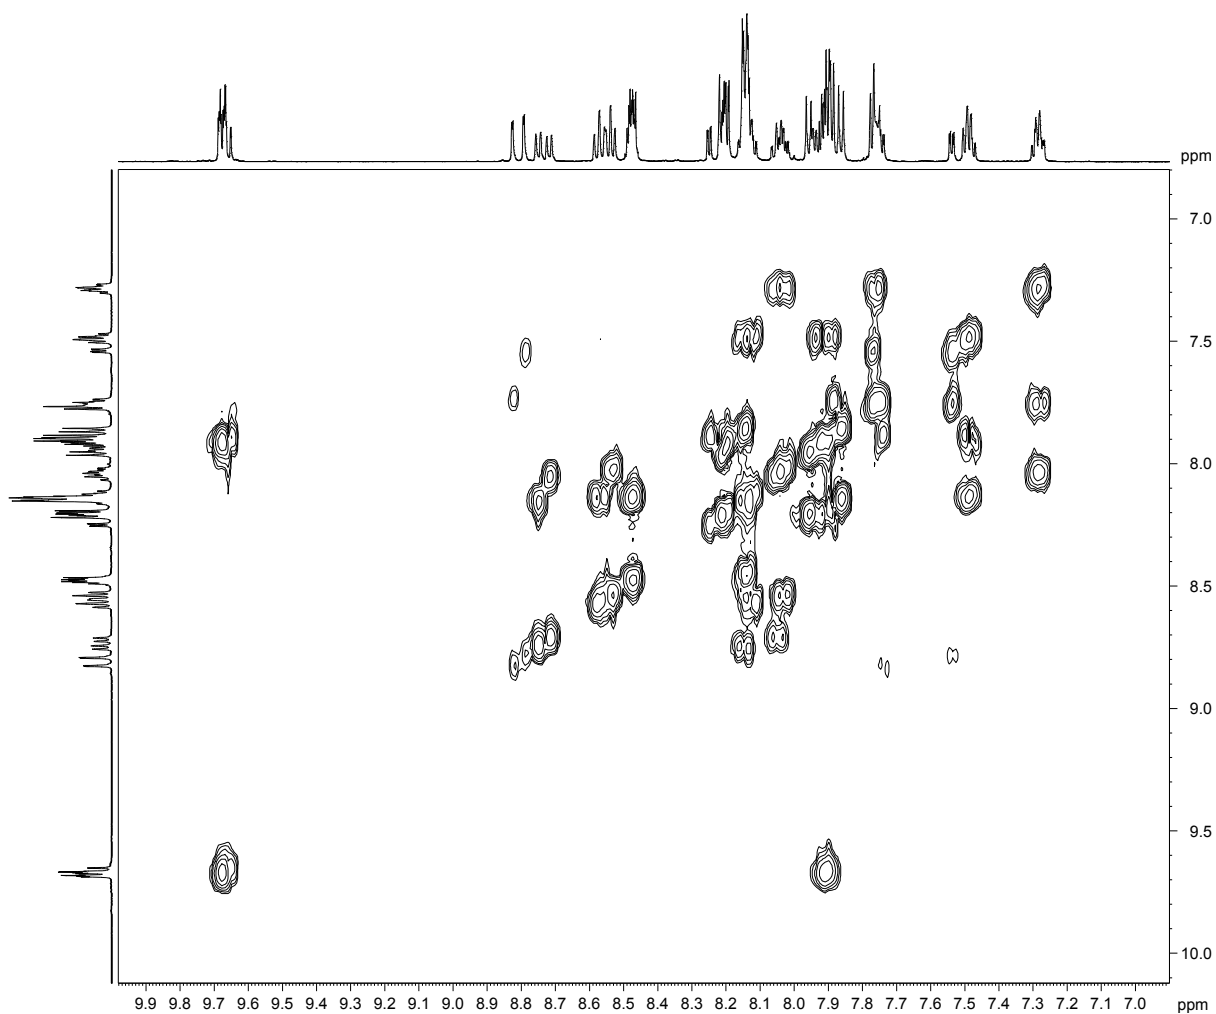

Figure S13 – COSY NMR Spectrum of **(5)** in CD<sub>3</sub>CN (aromatic region).

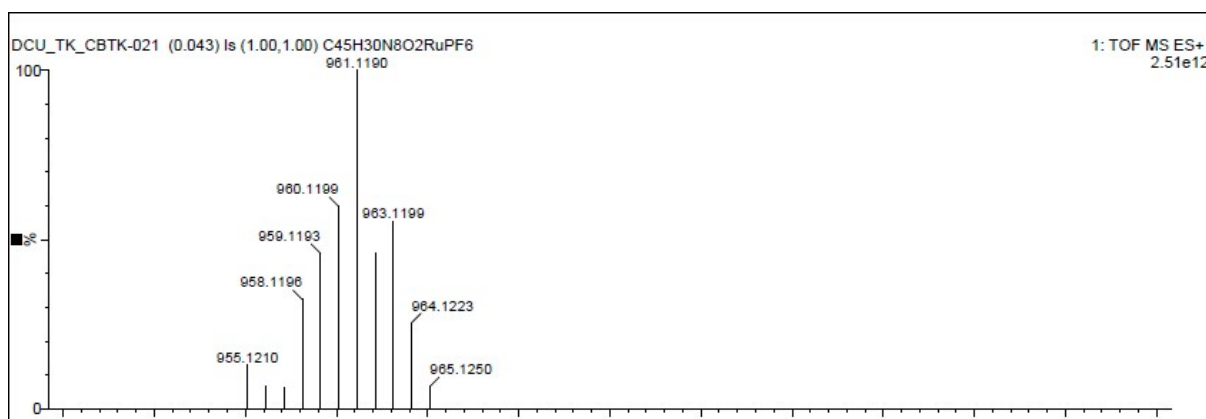

Figure S14 – HRMS (ESI-QTOF): Mass spectrum of **(5)** indicating [M – PF<sub>6</sub>]<sup>+</sup>.



**[Ru(dppz)(bpyArCOOH)(bpyArCOOEt)](PF<sub>6</sub>)<sub>2</sub> (6)**

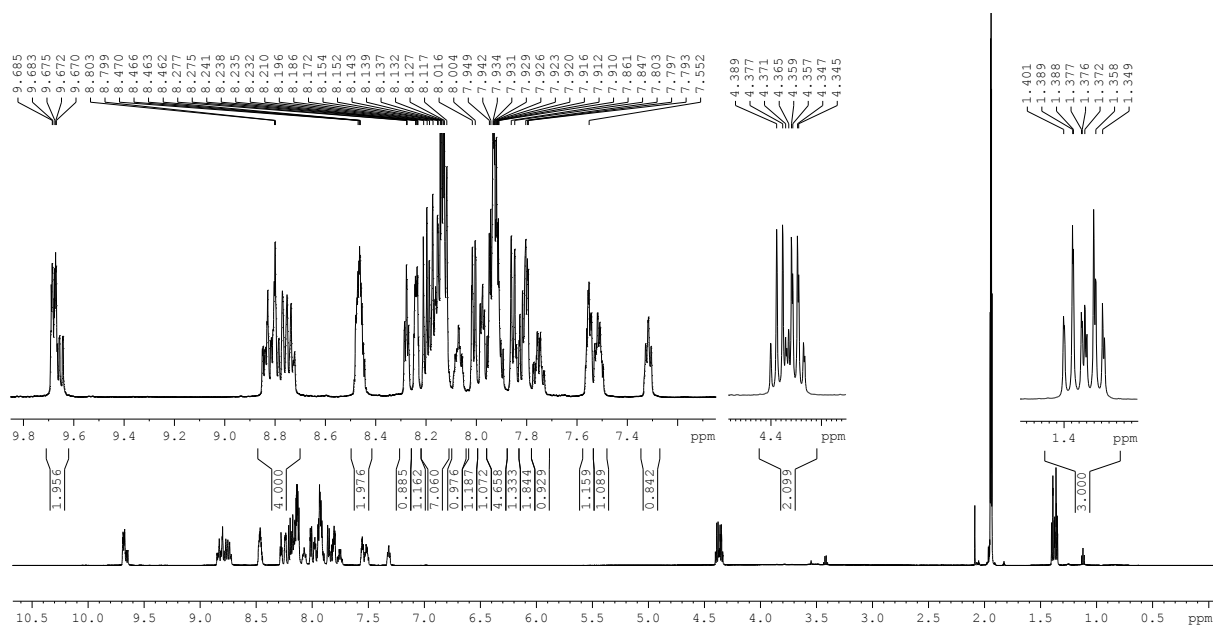

Figure S15 – <sup>1</sup>H NMR Spectrum (600 MHz) of (6) in CD<sub>3</sub>CN. Peaks at 1.1 and 3.4 are assigned to residual diethyl ether.

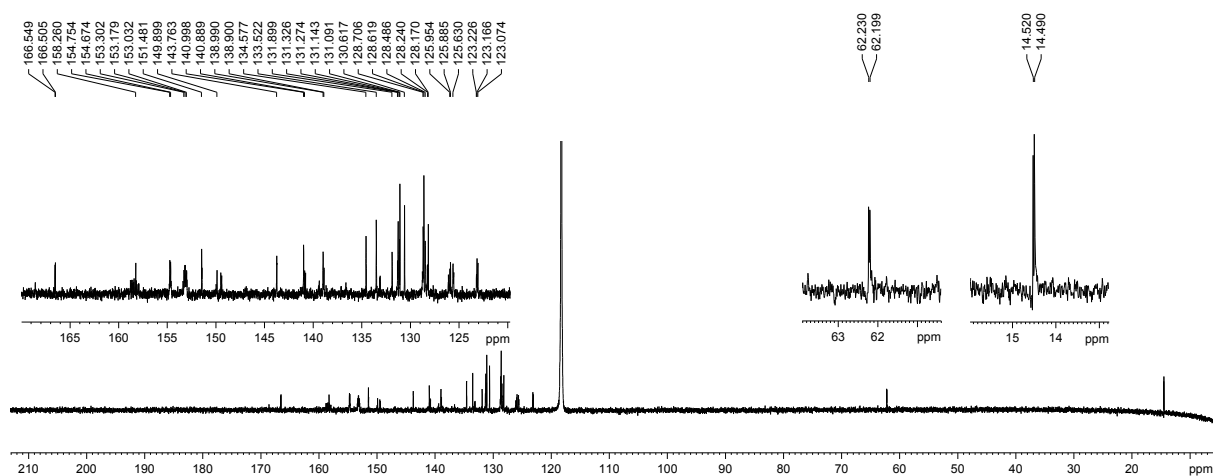

Figure S16 – <sup>13</sup>C NMR Spectrum of (6) in CD<sub>3</sub>CN.

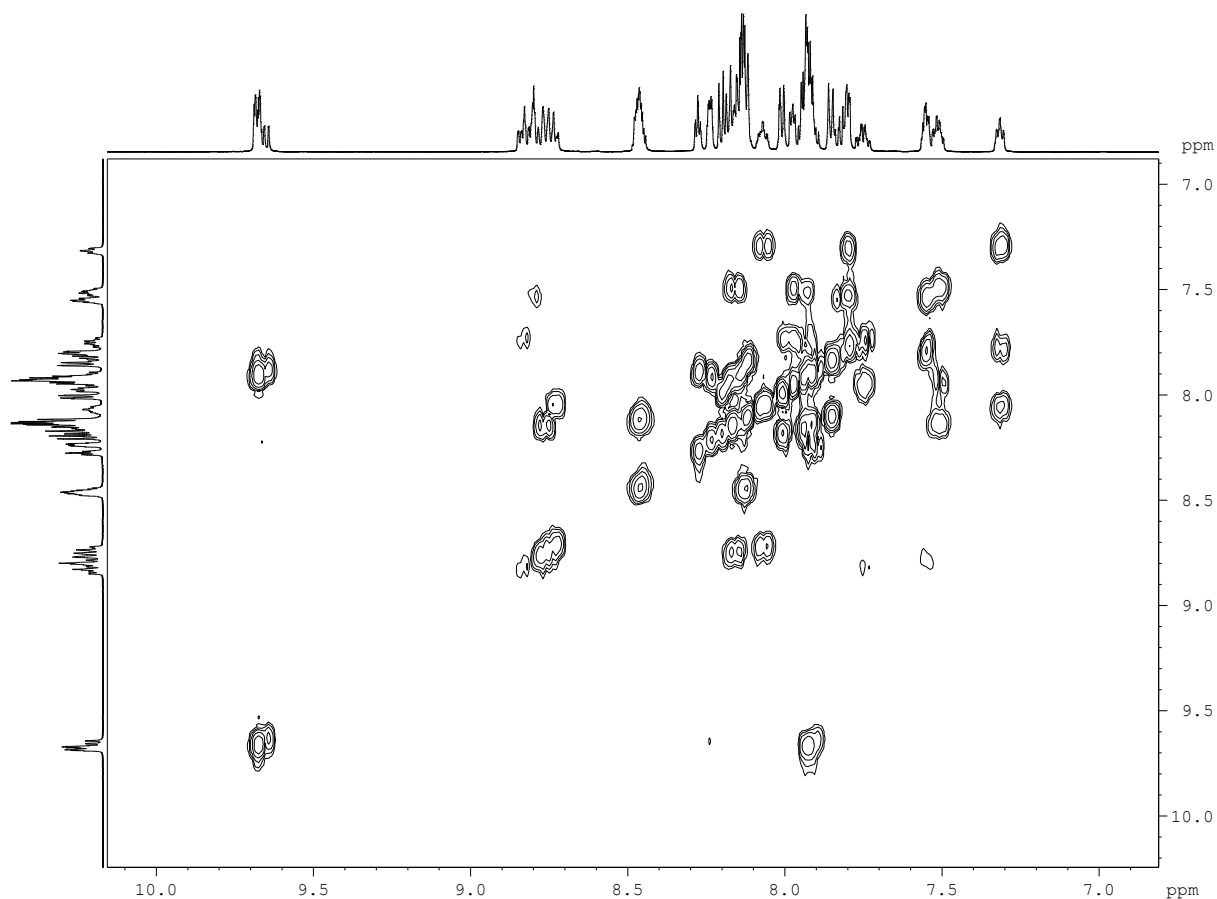

Figure S17 – COSY NMR Spectrum (600 MHz) of **(6)** in CD<sub>3</sub>CN (aromatic region).

### Single Mass Analysis

Tolerance = 6.0 PPM / DBE: min = -1.5, max = 1000.0  
 Isotope cluster parameters: Separation = 1.0 Abundance = 1.0%

Monoisotopic Mass, Odd and Even Electron Ions  
 459 formula(e) evaluated with 1 results within limits (all results (up to 1000) for each mass)

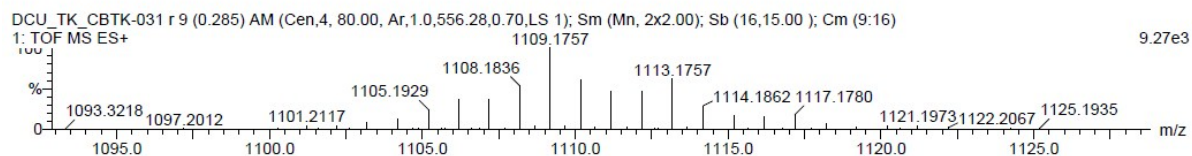

| Mass      | Calc. Mass | mDa | PPM | DBE  | Score | Formula               |
|-----------|------------|-----|-----|------|-------|-----------------------|
| 1109.1757 | 1109.1701  | 5.6 | 5.0 | 37.5 | 1     | C54 H38 N8 O4 F6 P Ru |

Figure S18 – HR-MS (ESI-QTOF): Single Mass Analysis of **(6)** indicating [M – PF<sub>6</sub>]<sup>+</sup>.

**[Ru(dppz)(bpy-PEG)(bpyArCOOEt)](PF<sub>6</sub>)<sub>2</sub> (**7**)**

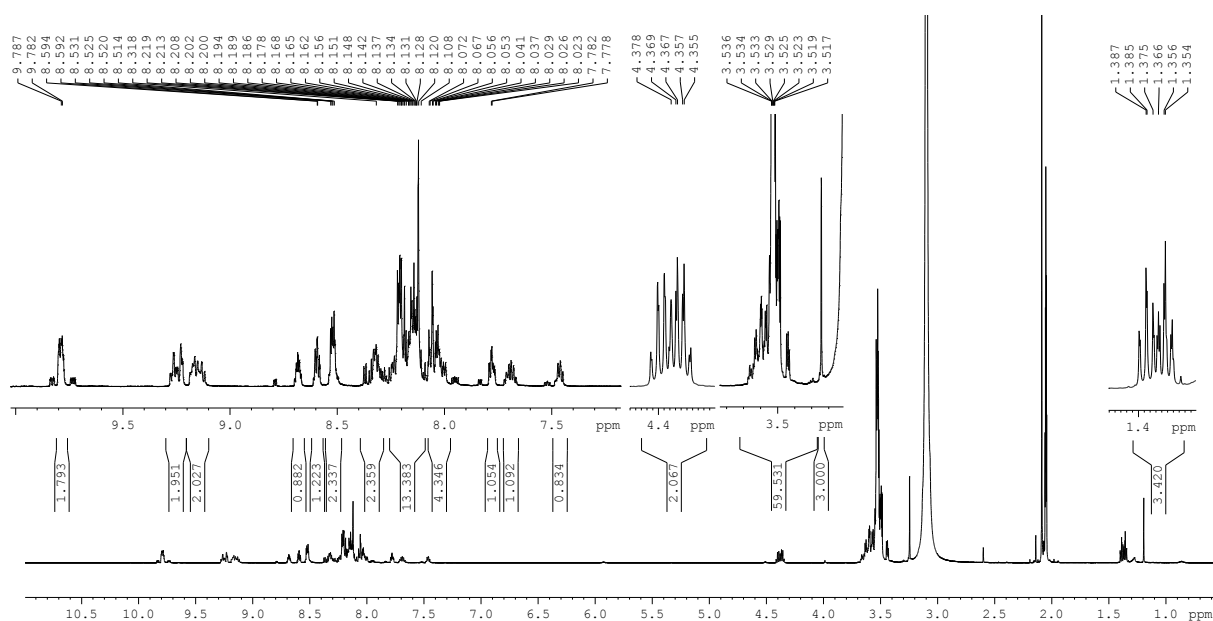

Figure S19 – <sup>1</sup>H NMR Spectrum (600 MHz) of (**7**) in acetone-d<sub>6</sub>. The peaks at 2.09 and 3.10 are assigned to residual acetone and water respectively.

**Single Mass Analysis**

Tolerance = 100.0 PPM / DBE: min = -1.5, max = 500.0

Element prediction: Off

Number of isotope peaks used for i-FIT = 3

Monoisotopic Mass, Odd and Even Electron Ions

5250 formula(e) evaluated with 1 results within limits (all results (up to 1000) for each mass)

Elements Used:

C: 0.85 H: 0.101 N: 0.9 O: 0.18 F: 0.6 P: 0.1 Ru: 0.1

Christopher Burke (TK), CBTK-032

Q-TOF20160108MF001 103 (2.067) AM (Cen,4, 80.00, Ar,10000.0,1570.68,0.70); Sm (SG, 1x5.00); Sb (15,10.00 ); Cm (46:125)

TOF MS LD+  
1.02e+004

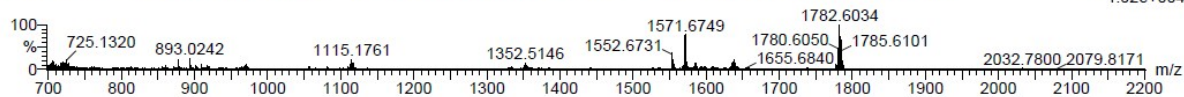

Minimum: -1.5  
Maximum: 5.0 100.0 500.0

| Mass      | Calc. Mass | mDa | PPM | DBE  | i-FIT | i-FIT (Norm) | Formula                 |
|-----------|------------|-----|-----|------|-------|--------------|-------------------------|
| 1782.6034 | 1782.5950  | 8.4 | 4.7 | 37.5 | 105.1 | 0.0          | C85 H101 N9 O18 F6 P Ru |

Figure S20 – HR-MS (MALDI-QTOF): Single Mass Analysis of (**7**) indicating [M – PF<sub>6</sub>]<sup>+</sup>.

**[Ru(dppz)(bpyArCONH-PEG<sub>15</sub>-OMe)(bpyArCOOH)](PF<sub>6</sub>)<sub>2</sub> (**8**)**

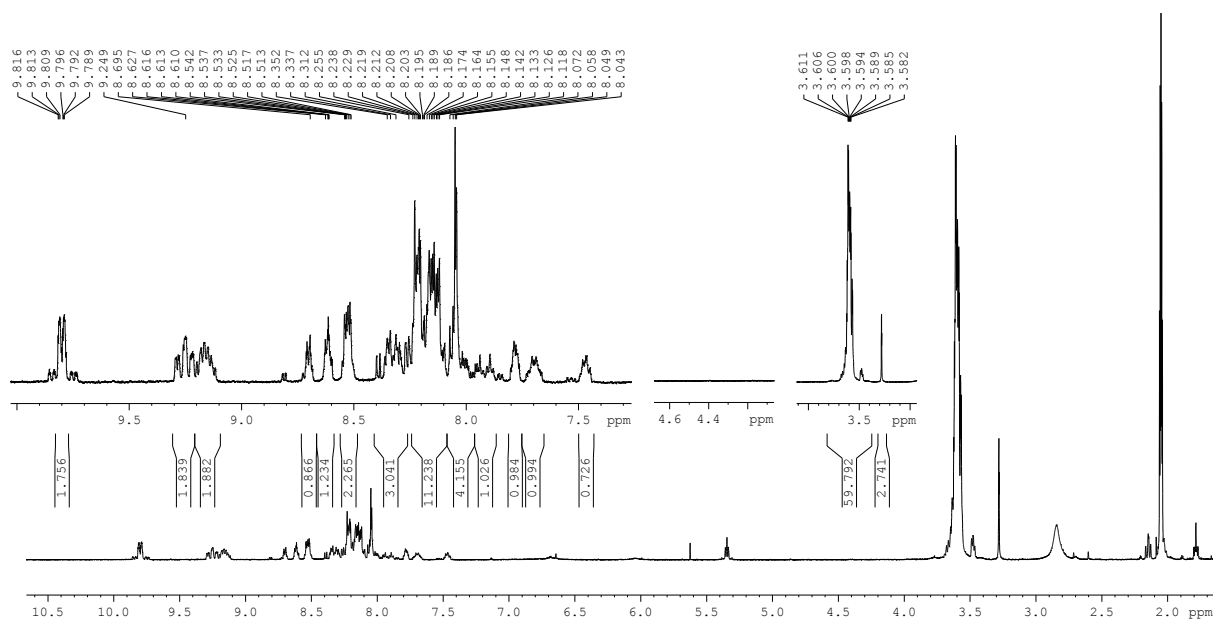

Figure S21 – <sup>1</sup>H NMR Spectrum (600 MHz) of (**8**) in acetone-d<sub>6</sub>. The peaks at 5.63, 2.84 and 1.79 are assigned to dichloromethane, water and THF residual solvents from reaction work-up.

**Single Mass Analysis**

Tolerance = 100.0 PPM / DBE: min = -1.5, max = 500.0

Element prediction: Off

Number of isotope peaks used for i-FIT = 3

Monoisotopic Mass, Odd and Even Electron Ions

5250 formula(e) evaluated with 1 results within limits (all results (up to 1000) for each mass)

Elements Used:

C: 0.83 H: 0.97 N: 0.9 O: 0.18 F: 0.6 P: 0.1 Ru: 0.1

Christopher Burke (TK), CBTK-033

Q-TOF20160108MF002 95 (1.925) AM (Cen,4, 80.00, Ar,10000.0,1570.68,0.70); Sm (SG, 1x5.00); Sb (15,10.00); Cm (27:122-(95:97+119))

TOF MS LD+  
2.96e+004

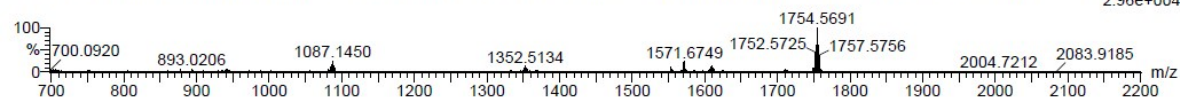

Minimum: -1.5  
Maximum: 5.0 100.0 500.0

| Mass      | Calc. Mass | mDa | PPM | DBE  | i-FIT | i-FIT (Norm) | Formula                   |
|-----------|------------|-----|-----|------|-------|--------------|---------------------------|
| 1754.5691 | 1754.5637  | 5.4 | 3.1 | 37.5 | 122.0 | 0.0          | C83 H97 N9 O18 F6 P<br>Ru |

Figure S22 – HR-MS (MALDI-QTOF): Single Mass Analysis of (**8**) indicating [M – PF<sub>6</sub>]<sup>+</sup>.

**[Ru(dppz)(bpy-PEG)(bpy-NfKb)](PF<sub>6</sub>)<sub>6</sub> (9)**

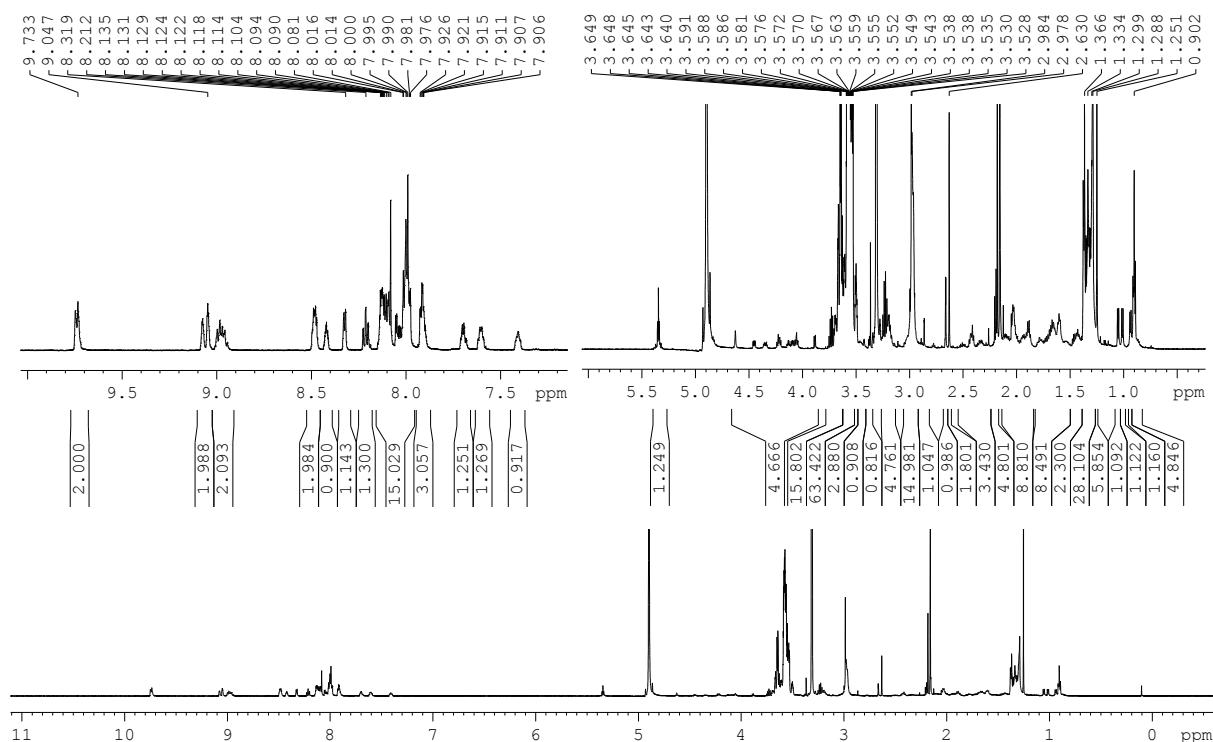

Figure S23 – <sup>1</sup>H NMR Spectrum (600 MHz) of **(9)** in methanol-d<sub>4</sub>. The peaks at 4.79 and 2.15 ppm are due to residual water and acetone solvent from reaction work-up.

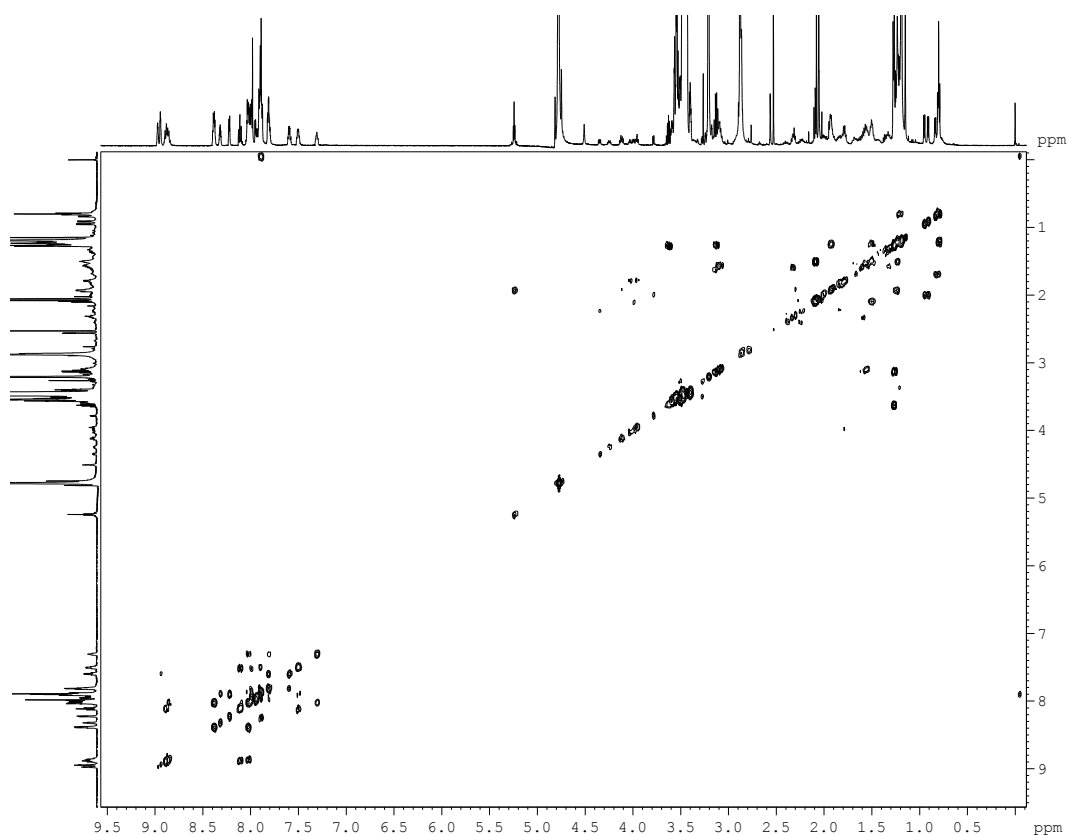

Figure S24 – COSY NMR Spectrum of **(9)** in methanol-d<sub>4</sub>.

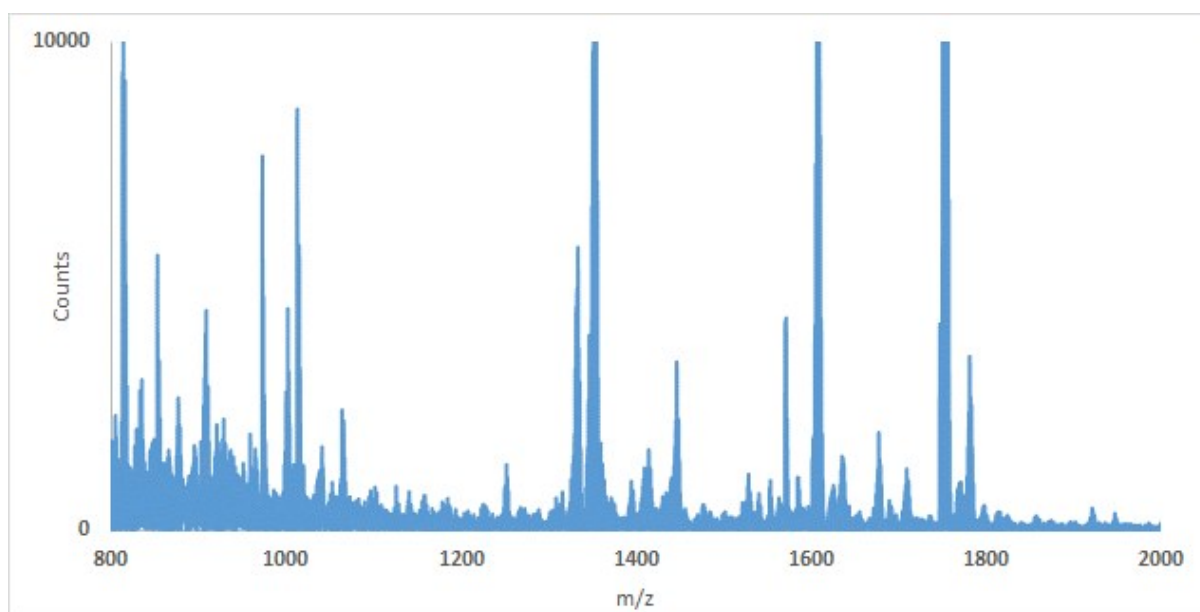

Figure S25 – HR-MS (MALDI-QTOF): Mass spectrum of **(9)**.

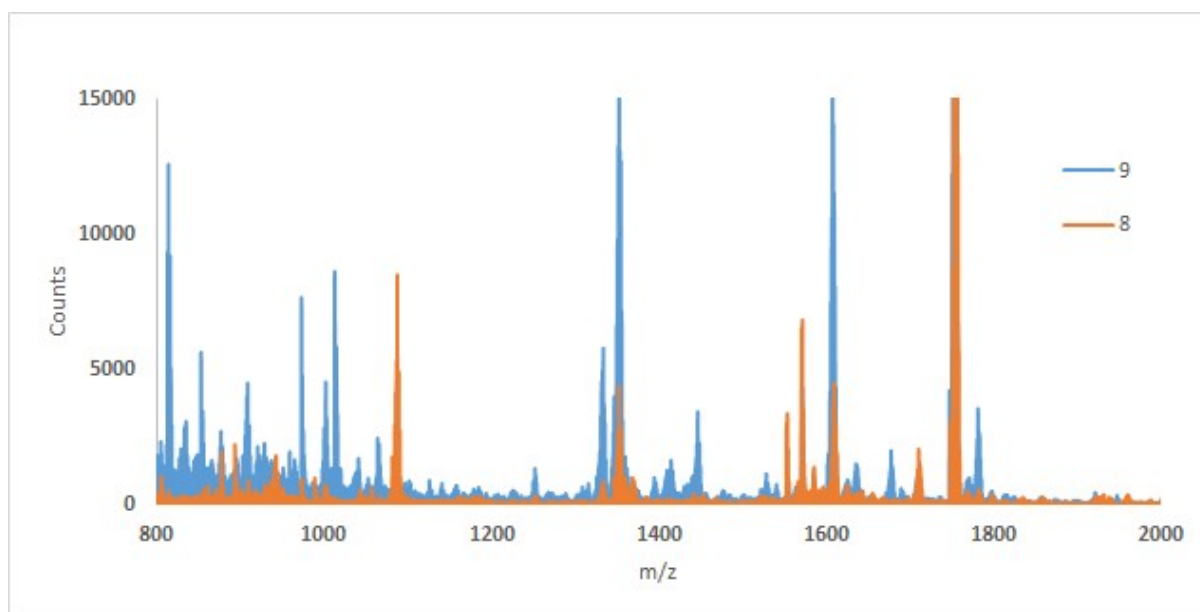

Figure S26 –Spectral overlay of the mass spectra of **(8)** and **(9)**.

## HPLC Analysis of the Conjugates

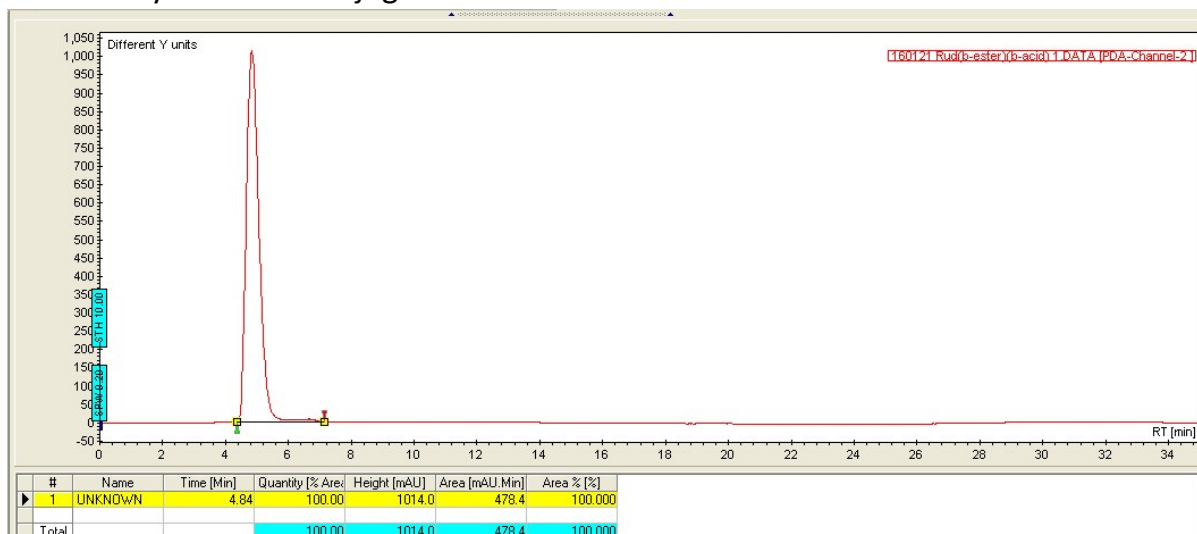

Figure S27 – HPLC trace (RP-C18, MeCN/Water (0.1 % TFA) Gradient; PDAD) for **(6)**. Indicative Purity (vs Ru(II) precursors; 450 nm) = 100 %.

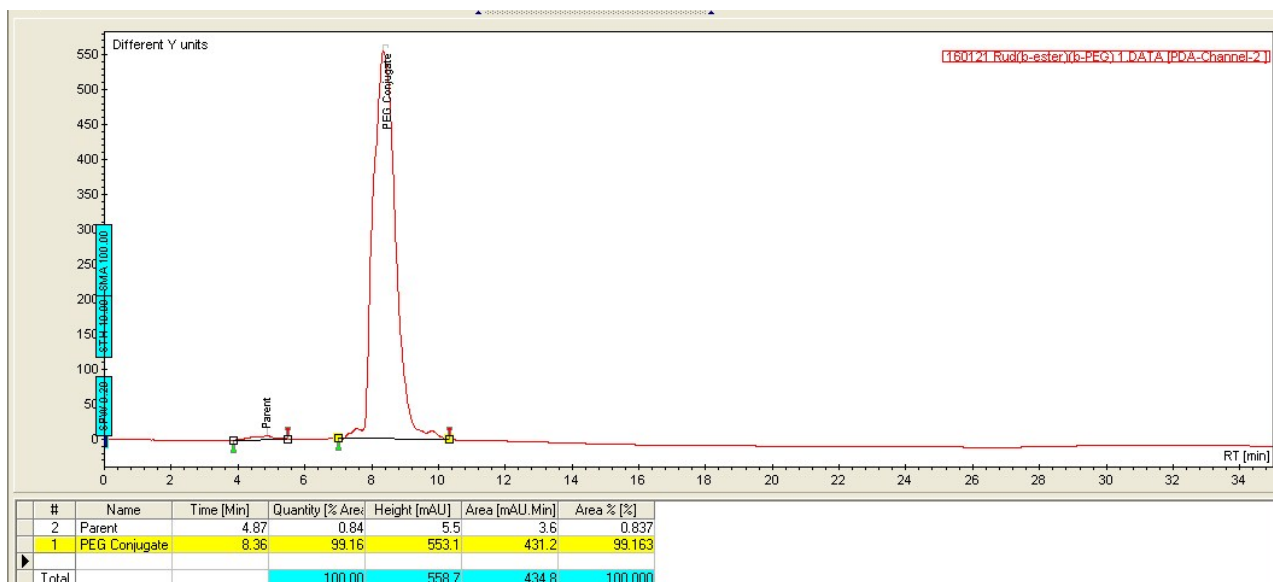

Figure S28 – HPLC trace (RP-C18, MeCN/Water (0.1 % TFA) Gradient; PDAD) for **(7)**. Indicative Purity (vs Ru(II) precursors; 450 nm) = 99.2 %.

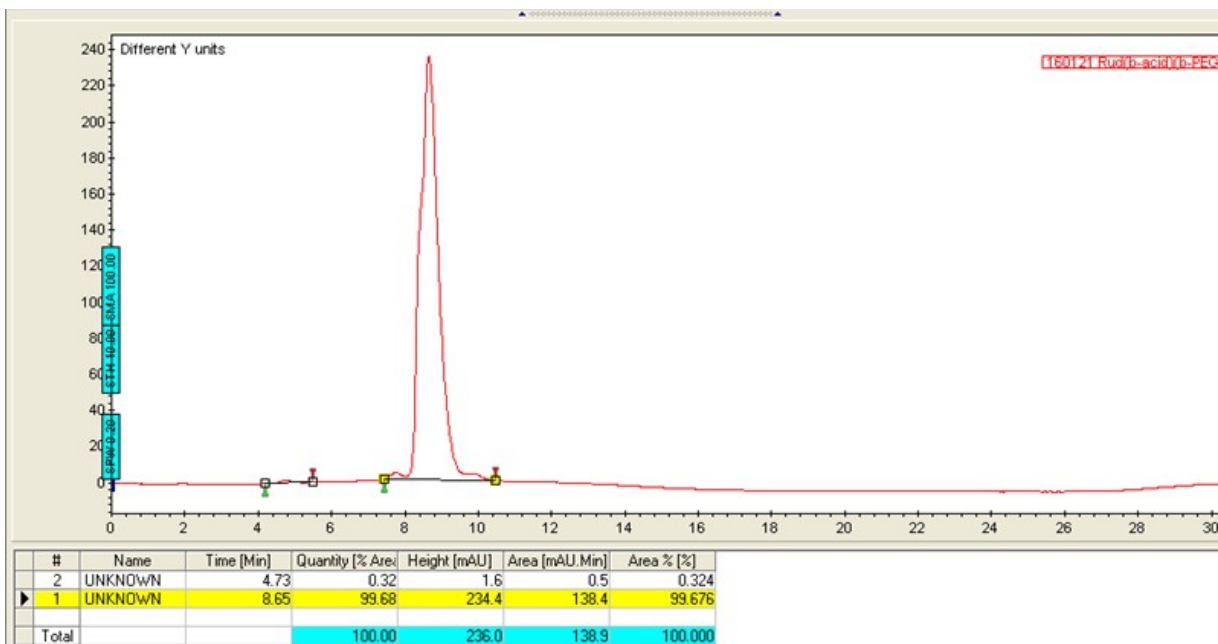

Figure S29 – HPLC trace (RP-C18, MeCN/Water (0.1 % TFA) Gradient; PDAD) for **(8)**. Indicative Purity (vs Ru(II) precursors; 450 nm) = 99.7 %.

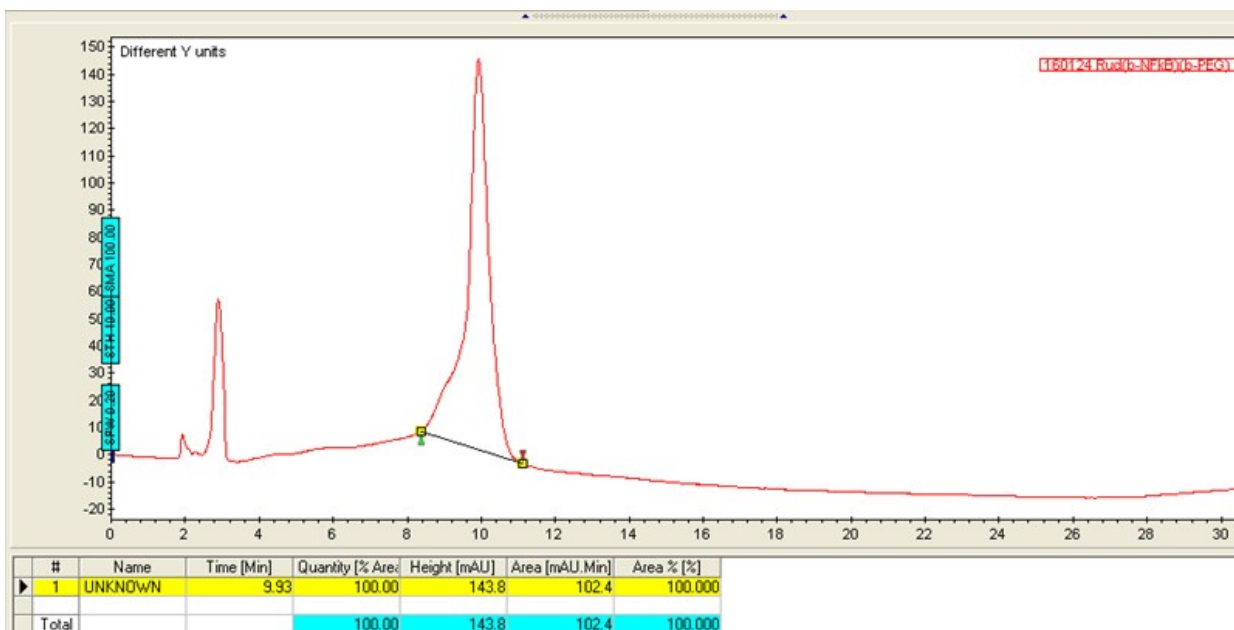

Figure S30 – HPLC trace (RP-C18, MeCN/Water (0.1 % TFA) Gradient; PDAD) for **(9)**. Early eluting peaks are due to sample solvent.



## Additional Photophysical Data

### General Information

For compounds **(4)** – **(6)**, solutions were prepared in MeCN using the PF<sub>6</sub><sup>-</sup> salt of the complex whereas the Cl<sup>-</sup> salt was preferred for the aqueous samples. Samples **(7)** and **(9)** were prepared from their PF<sub>6</sub><sup>-</sup> salts and required *ca.* 0.5 % v/v DMSO as an initial solubilising agent. All scans and lifetime measurements were performed using 10 μM solutions. The extinction coefficients were calculated from standard curves (5 – 30 μM). Standard deviations are calculated from triplicate analyses. All lifetime curve fitting conformed to chi-squared tail-fit criteria of  $0.9 < \chi^2 < 1.10$ . Slit widths set to 5 nm for emission and excitation runs. Deaeration was performed by bubbling N<sub>2</sub> through the analytical sample for 15 mins minutes.

### Charts

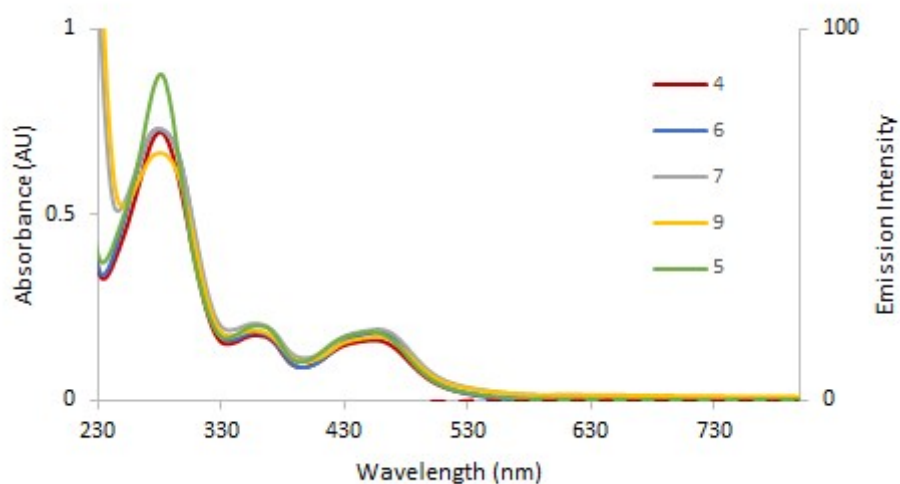

Figure S31 – Absorbance (full lines) and emission (dashed lines) spectra in water for the complexes **(4)** – **(9)**.
